# Supplementary material for: Tunable Parity-Time Symmetry Vortex Laser from Phase Change Material Based Microcavity
Source: Research Square preprint supplement (doi:10.21203/rs.3.rs-2995776/v1), 2023-07-17
Supplement: Supplementary file 1 [file be23451c0b116343fb704901.docx]

Supplementary Information

Tunable Parity-Time Symmetry Vortex Laser from Phase Change Material Based Microcavity

*Ying Su*,1 *Hongji Fan*1 *and Tun Cao*1, *

1School of Optoelectronic Engineering and Instrumentation Science, Dalian University of Technology, Dalian 116024, China

* Corresponding author: *Tun Cao*, [caotun1806@dlut.edu.cn](mailto:caotun1806@dlut.edu.cn)

Table of Content

Note S1: Theoretical analysis of unidirectional laser oscillation at the EP

Fig S1: The tunable vortex laser emission from the ring cavity

Tab S1: List of parameters required for simulation

**Note S1. Theoretical analysis of unidirectional laser oscillation at the EP**

the refractive index equations as follow:

(s1)

where is the unperturbed part of the refractive index (effective index of GST225/InGaAsP stacked layers), the azimuthal number of the targeted WGM, integer number from {0, 1}.

To investigate unidirectional power flow circulating inside the cavity at the exceptional point (EP) modification of index and loss/gain gratings (), the semiconductor rate equations are adopt. The equations describe the linear and nonlinear competition of clockwise and counterclockwise whispering gallery modes (WGMs) in the microring cavity,

(s2)

(s3)

(s4)

whereand are the slowly-varying normalized amplitudes of clockwise and counterclockwise propagating WGMs. is the carrier density, is the field decay rate, is the decay rate of the carrier population, is the linewidth enhancement factor, is the normalized injection current, and , and  is the self- and cross-saturation coefficients. Linear mode coupling stems from the combined index and loss/gain gratings and is expressed by the parameters of and in the rate equations. In the lack of the alternate bilayer Cr/Ge and single-layer Ge gratings (), and do not completely disappear due to spurious backscattering in microring cavity while taking a small and indentical value,, where and are the dissipative and conservative couplings, respectively.1,2 When the two gratings are planted on the top of the microring, linear mode coupling is controlled by the relative strengths and of the paired gratings. Particularly, when the paired grating strengths are indentical , the linear coupling is unidirectional, e.g. corresponding to the EP operation of the microring laser.3 Nonlinear coupling of WGMs is caused by gain saturation. The modes saturate both each others and their own gains through the effects of carrier heating and spectral hole burning, which are contained in the *s* and *c>s* saturation parameters.4 Herein, grating effects in the carrier density is ignored since the standing-wave mode pattern exhibits a spatial period much smaller compared to the legnth of carrier diffusion. Therefore at the EP condition , the counterclockwise WGM () can dominate over the the clockwise WGM () and obtain stable and robust unidirectional laser oscillation.


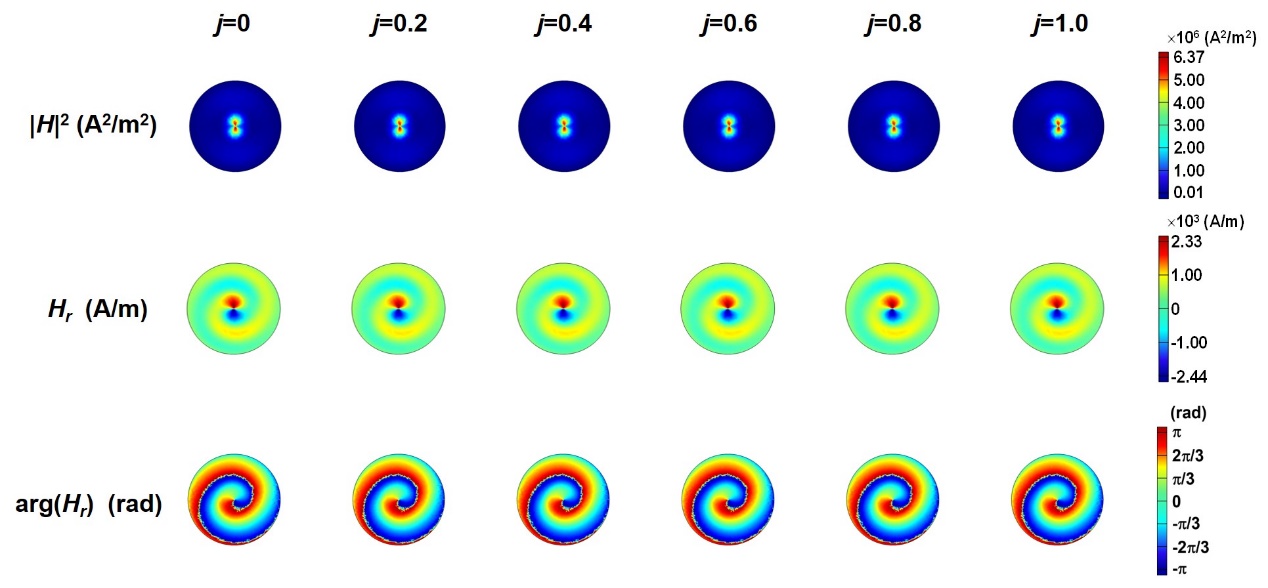


**Fig S1.** The tunable vortex laser emission from the ring cavity.The device maintains at the EP, having the indentical index modulation (). The first row shows the distribution of in the cross section at the middle of the microring (*z* = 0). The distributions ofand arg () in the cross section at far field (*z* = 4800 nm) are presented in the second, the third row, respectively. The resonant wavelengths of the ring cavity are λ = 1544.5, 1550.5, 1555.6, 1559.9, 1562.9 and 1565.9 nm for the different crystllisation ratios of *j* = 0, 0.2, 0.4, 0.6, 0.8 and 1.0, accordingly.

**Tab S1. List of parameters required for simulation**

|  | Special  heat capacity  CS(J / (Kg ⋅K)) | Density  ρ(kg/m3 ) | Thermal  conductivity  k(W/(m⋅ k)) | Electrical  conductivity  sigma(S/m) | Relative  permittivity  epsilnr(1) | Seebeck  coefficient  S(V/K) |
| --- | --- | --- | --- | --- | --- | --- |
| Ag | 235S1 | 10500S1 | 429S1 | Temperature  DependenceS2 | Frequency  DependenceS3 | Temperature  DependenceS2 |
| Cu | 384S1 | 8960S1 | 401S1 | Temperature  DependenceS2 | Frequency  DependenceS3 | Temperature  DependenceS2 |
| GeTe | 140S4 | 6140S4 | Temperature  DependenceS4 | Temperature  DependenceS4 | Frequency  DependenceS5 | Temperature  DependenceS4 |

**References**

S1 Sorel, M.; Laybourn, P. J. R.; Scire, A.; Balle, S.; Giuliani, G.; Miglierina, R.; Donati, S. Opt. Lett. 27, 1992-1994 (2002).

S2 Sorel, M.; Giuliani, G.; Scire, A.; Miglierina, R.; Donati, S.; Laybourn, P. J. R. IEEE J. Quantum Electron. 39, 1187-1195 (2003).

S3 Longhi, S.; Feng, L. Opt. Lett. 39, 5026-5029 (2014).

S4 Van der Sande, G.; Gelens, L.; Tassin, P.; Scire, A.; Danckaert, J. J. Phys. B. 41, 095402 (2008).

S5 Shportko, K.; Kremers, S.; Woda, M.; Lencer, D.; Robertson, J.; Wuttig, M. K. Nat. Mater. 7, 653-658 (2008).
